# Supplementary material for: A Cell-Based MAPK Reporter Assay Reveals Synergistic MAPK Pathway Activity Suppression by MAPK Inhibitor Combination in BRAF -Driven Pediatric Low-Grade Glioma Cells
Source: Oxford University Press journal article supplement (doi:10.1158/1535-7163.mct-19-1021), 2020-05-25
Supplement: 15357163mct191021-sup-231430_2_supp_6267049_q9lc9q.xlsx [file 15357163mct191021-sup-231430_2_supp_6267049_q9lc9q.xlsx]

## Sheet: Supp. Table S2
Overview of MAPKi and other drugs used in the screen
	Inhibitor name	Synonyms	Target	Company	Cat no.	Stock conc.	Provision
RAF inhibitor	AZ 628	-	pan-RAF	Selleckchem	S2746	10mM	Included in library
	TAK-632	-	pan-RAF	Selleckchem	S7291	10mM	Included in library
	sorafenib	BAY 43-9006	c-RAF, BRAF, VEGFR-2, PDGFR	Selleckchem	S7397	10mM	Included in library
	sorafenib tosylate	BAY 43-9006	c-RAF, BRAF, VEGFR-2, PDGFR	Selleckchem	S1040	10mM	Included in library
	GDC-0879	AR-00341677	BRAF, c-RAF	Selleckchem	S1104	10mM	Included in library
	SB590885	-	BRAF, c-RAF	Selleckchem	S2220	10mM	Included in library
	ZM 336372	Zinc00581684	c-RAF, BRAF	Selleckchem	S2720	10mM	Included in library
	GW5074	-	c-RAF	Selleckchem	S2872	10mM	Included in library
	RAF265	CHIR-265	c-RAF/BRAF/BRAF V600E, VEGFR2	Selleckchem	S2161	10mM	Included in library
	vemurafenib	PLX4032, RG7204, RO5185426	BRAF V600E	Selleckchem	S1267	10mM	Included in library
	encorafenib	LGX818	BRAF V600E	Selleckchem	S1708	10mM	Included in library
	CEP-32496	RXDX-105, agerafenib	BRAF V600E, c-RAF	Selleckchem	S8015	10mM	Included in library
	dabrafenib	GSK2118436	BRAF V600E	Selleckchem	S2807	10mM	Included in library
	PLX-4720	-	BRAF V600E	Selleckchem	S1152	10mM	Included in library
	LXH254	-	pan-RAF	Novartis	-	10mM	Cherry picked
	RAF709	-	BRAF, c-RAF	Cayman Chemical	23820	10mM	Cherry picked
	PLX7904	PLX PB04	pan-RAF	Selleckchem	S7964	10mM	Cherry picked
	LY3009120	DP-4978	pan-RAF	Selleckchem	S7842	5mM	Cherry picked
	PLX8394	PLX PB03	pan-RAF	MedChemExpress	HY-18972	10mM	Cherry picked
	BI 882370	-	pan-RAF	Cayman Chemical	24273	10mM	Cherry picked
MEK inhibitor	PD0325901	-	MEK	Selleckchem	S1036	10mM	Included in library
	PD98059	-	MEK	Selleckchem	S1177	10mM	Included in library
	TAK-733	-	MEK	Selleckchem	S2617	10mM	Included in library
	selumetinib	AZD6244, ARRY-142886	MEK1, ERK1/2	Selleckchem	S1008	10mM	Included in library
	AZD8330	ARRY704	MEK1/2	Selleckchem	S2134	10mM	Included in library
	binimetinib	MEK162, ARRY-162, ARRY-438162	MEK1/2	Selleckchem	S7007	10mM	Included in library
	PD184352	CI-1040	MEK1/2	Selleckchem	S1020	10mM	Included in library
	PD318088	-	MEK1/2	Selleckchem	S1568	10mM	Included in library
	pimasertib	AS-703026, MSC1936369B, SAR 245509	MEK1/2	Selleckchem	S1475	10mM	Included in library
	refametinib	RDEA119, Bay 86-9766	MEK1/2	Selleckchem	S1089	10mM	Included in library
	SL-327	-	MEK1/2	Selleckchem	S1066	10mM	Included in library
	trametinib	GSK1120212, JTP-74057	MEK1/2	Selleckchem	S2673	10mM	Included in library
	U0126-EtOH	-	MEK1/2	Selleckchem	S1102	10mM	Included in library
	cobimetinib	GDC-0973, RG7420, XL518	MEK1	Selleckchem	S8041	10mM	Cherry picked
ERK inhibitor	GDC-0994	ravoxertinib	ERK1/2	Selleckchem	S7554	10mM	Included in library
	ulixertinib	BVD-523, VRT752271	ERK1/2	Selleckchem	S7854	10mM	Included in library
	(5Z)-7-oxo zeaenol	FR148083	ERK1/2	Cayman Chemical	17459	10mM	Cherry picked
	SCH772984	-	ERK1/2	Cayman Chemical	19166	10mM	Cherry picked
	LY3214996	-	ERK1/2	Eli Lilly and Company	-	10mM	Cherry picked
	LTT462	-	ERK1/2	Novartis	-	10mM	Cherry picked
Others	losmapimod	GW856553X	p38 MAPK	Selleckchem	S7215	10mM	Included in library
	LY2228820	ralimetinib	p38 MAPK	Selleckchem	S1494	10mM	Included in library
	SB203580	RWJ 64809, PB 203580	p38 MAPK	Selleckchem	S1076	10mM	Included in library
	PH-797804	-	p38a	Selleckchem	S2726	10mM	Included in library
	TAK-715	-	p38a	Selleckchem	S2928	10mM	Included in library
	VX-702	-	p38a	Selleckchem	S6005	10mM	Included in library
	VX-745	-	p38a	Selleckchem	S1458	10mM	Included in library
	skepinone-l	-	p38a MAPK	Selleckchem	S7214	10mM	Included in library
	SB202190	FHPI	p38a/b	Selleckchem	S1077	10mM	Included in library
	BIRB 796	doramapimod	pan-p38 MAPK	Selleckchem	S1574	10mM	Included in library
	SP600125	Nsc75890	JNK1,2,3	Selleckchem	S1460	10mM	Included in library
	JNK-IN-8	-	JNK1,2,4	Selleckchem	S4901	10mM	Included in library
	JNK Inhibitor IX	TCS JNK 5a	JNK2,3	Selleckchem	S7508	10mM	Included in library
	BIX 02188	-	MEK5	Selleckchem	S1530	10mM	Included in library
	BIX 02189	-	MEK5	Selleckchem	S1531	10mM	Included in library
	XMD8-92	-	BMK1/ERK5	Selleckchem	S7525	10mM	Included in library
	asiatic acid	dammarolic acid	unspecific	Selleckchem	S2266	10mM	Included in library
Chemo	carboplatin	JM-8, CBDCA, NSC 241240	DNA	Selleckchem	S1215	10mM	Included in library
	vinblastine	NSC49842	microtubules	Selleckchem	S4505	10mM	Included in library
	vincristine	leurocristine	microtubules	Selleckchem	S1241	10mM	Included in library
