# Supplementary material for: A Cell-Based MAPK Reporter Assay Reveals Synergistic MAPK Pathway Activity Suppression by MAPK Inhibitor Combination in BRAF -Driven Pediatric Low-Grade Glioma Cells
Source: Oxford University Press journal article supplement (doi:10.1158/1535-7163.mct-19-1021), 2020-05-25
Supplement: 15357163mct191021-sup-231430_2_supp_6267050_q9l19q.xlsx [file 15357163mct191021-sup-231430_2_supp_6267050_q9l19q.xlsx]

## Sheet: Supp. Table S3
Screening for false positive results using the reporter assay without ELK-1 binding site in DKFZ-BT66 and BT-40 cells
Inhibitor	DKFZ-BT66 pDIPZ-CMV w/o BS	Inhibitor	BT-40 pDIPZ-CMV w/o BS
	luminescence intensitiy in % of untreated after treatment with estimated IC50 concentrations (IC50screen) of each drug		luminescence intensitiy in % of untreated after treatment with estimated IC50 concentrations (IC50screen) of each drug
sorafenib	0.612214	sorafenib tosylate	0.39922
TAK-632	0.653054	PLX-4720	0.762715
sorafenib tosylate	0.695027	AZD8330	0.808432
carboplatin	0.743647	GDC-0879	0.833073
LY3214996	0.802414	CEP-32496	0.834789
vincristine	0.814803	TAK-733	0.841616
CEP-32496	0.824542	PD98059	0.865211
GW5074	0.828701	RAF265	0.869891
BI 882370	0.834816	AZ 628	0.871685
JNK Inhibitor IX	0.842125	vemurafenib	0.879563
AZ 628	0.863679	SL-327	0.886181
PLX8394	0.865311	PD0325901	0.897036
losmapimod	0.891235	PD184352	0.897884
SB590885	0.891851	selumetinib	0.905178
binimetinib	0.900094	BI 882370	0.907178
AZD8330	0.91065	PD318088	0.908785
PD98059	0.924182	XMD8-92	0.913362
VX-745	0.925884	JNK Inhibitor IX	0.917109
cobimetinib	0.928844	ulixertinib	0.923052
RAF265	0.936472	GDC-0994	0.923533
PD318088	0.938549	GW5074	0.933697
BIX 02188	0.941577	PLX8394	0.941213
TAK-733	0.941753	VX-745	0.941929
PD184352	0.944958	encorafenib	0.94649
selumetinib	0.9459	dabrafenib	0.947894
BIRB 796	0.94914	refametinib	0.949182
SP600125	0.949707	losmapimod	0.951427
vemurafenib	0.95727	TAK-632	0.95741
(5Z)-7-Oxo Zaenol	0.960928	trametinib	0.958641
SCH772984	0.961881	SB590885	0.960842
LY2228820	0.96475	PH-797804	0.977677
SL-327	0.96607	pimasertib	0.978198
refametinib	0.97606	PLX7904	0.990385
vinblastine	0.977128	SP600125	1.0064
PLX7904	0.978717	TAK-715	1.00702
dabrafenib	0.979013	JNK-IN-8	1.00718
ZM 336372	0.98374	sorafenib	1.00733
PD0325901	0.984685	LXH254	1.00893
LY3009120	0.987611	BIX 02188	1.00952
LXH254	0.989517	LTT462	1.0099
TAK-715	0.98979	U0126-EtOH	1.01234
ulixertinib	0.99114	cobimetinib	1.01305
GDC-0994	0.992837	VX-702	1.01702
SB202190	0.993193	skepinone-l	1.01889
XMD8-92	0.994895	BIRB 796	1.02357
GDC-0879	1.00605	BIX 02189	1.03746
skepinone-l	1.00681	ZM 336372	1.04087
trametinib	1.00697	carboplatin	1.05082
encorafenib	1.01002	binimetinib	1.0513
asiatic acid	1.01144	LY2228820	1.06252
PH-797804	1.01191	asiatic acid	1.06319
JNK-IN-8	1.01191	LY3009120	1.06319
LTT462	1.02033	vincristine	1.06456
RAF709	1.02764	(5Z)-7-Oxo Zaenol	1.07418
U0126-EtOH	1.03393	SB203580	1.09731
BIX 02189	1.03422	SB202190	1.10006
SB203580	1.04317	LY3214996	1.10989
VX-702	1.05256	RAF709	1.11745
PLX-4720	1.06712	SCH772984	1.13942
pimasertib	1.07465	vinblastine	1.14835
