# Supplementary material for: A Cell-Based MAPK Reporter Assay Reveals Synergistic MAPK Pathway Activity Suppression by MAPK Inhibitor Combination in BRAF -Driven Pediatric Low-Grade Glioma Cells
Source: Oxford University Press journal article supplement (doi:10.1158/1535-7163.mct-19-1021), 2020-05-25
Supplement: 15357163mct191021-sup-231430_2_supp_6267051_q9lr9q.xlsx [file 15357163mct191021-sup-231430_2_supp_6267051_q9lr9q.xlsx]

## Sheet: Supp. Table S4
MAPKi combinations chosen based on low estimated IC50s and pharmaceutical company in consideration of future clinical studies
Mutation	Class	Inhibitor	Clinical phase	Class	Inhibitor	Clinical phase	Reference
BRAF fusion	MEKi	trametinib (Novartis)	FDA approved for melanoma, NSCLC1	+RAFi	LXH254 (Novartis)	Phase I in solid tumors³	[1,3]
		selumetinib (Astra Zeneca)	Orphan Drug FDA approved for NF 1; Phase III for melanoma, NSCLC1		AZ628 (Astra Zeneca)	Pre-clinical³	[1,3]
	RAFi	LY3009120 (Eli Lilly and Company)	Phase I in advanced cancer³	+ERKi	LY3214996 (Eli Lilly and Company)	Phase I in advanced/metastatic cancer2	[2,3]
		LXH254 (Novartis)	Phase I in solid tumors³		LTT462 (Novartis)	Phase I in solid tumors²	[2,3]
	MEKi	trametinib (Novartis)	FDA approved for melanoma, NSCLC1	+ERKi	LTT462 (Novartis)	Phase I in solid tumors²	[1,2]
		pimasertib (Merck)	Phase II for colorectal cancer, multiple myeloma1		SCH772984 (Merck)	Phase I in solid tumors²	[1,2]
BRAF V600E	MEKi	trametinib (Novartis)	FDA approved for melanoma, NSCLC1	+RAFi	dabrafenib (Novartis)	FDA approved for melanoma, NSCLC³	[1,3]
		selumetinib (Astra Zeneca)	Orphan Drug FDA approved for NF 1; Phase III for melanoma, NSCLC1		AZ628 (Astra Zeneca)	Pre-clinical³	[1,3]
		cobimetinib (Roche)	FDA approved for melanoma1		vemurafenib (Roche)	FDA approved for melanoma, Erdheim-Chester disease³	[1,3]
	RAFi	dabrafenib (Novartis)	FDA approved for melanoma, NSCLC³	+ERKi	LTT462 (Novartis)	Phase I in solid tumors²	[2,3]
		dabrafenib (Novartis)	FDA approved for melanoma, NSCLC³		ulixertinib (BioMed Valley Discoveries)	Phase I in patients with advanced malignancies²	[2,3]
		encorafenib (Array)	FDA approved for melanoma³		GDC-0994 (Array)	Phase I in solid tumors²	[2,3]
		encorafenib (Array)	FDA approved for melanoma³		ulixertinib (BioMed Valley Discoveries)	Phase I in patients with advanced malignancies²	[2,3]
	MEKi	trametinib (Novartis)	FDA approved for melanoma, NSCLC1	+ERKi	LTT462 (Novartis)	Phase I in solid tumors²	[1,2]
		pimasertib (Merck)	Phase II for colorectal cancer,multiple myeloma1		SCH772984 (Merck)	Phase I in solid tumors²	[1,2]
		Literature
		1. Current Development Status of MEK Inhibitors, Cheng et al., Molecules 2017
		2. ERK1/2 inhibitors: New weapons to inhibit the RAS-regulated RAF-MEK1/2-ERK1/2 pathway, Kidger et al., Pharmacology & Therapeutics 2018
		3. Current Insights of BRAF Inhibitors in Cancer, Agianian et al., Journal of Medicinal Chemistry 2018
