# Supplementary material for: A Cell-Based MAPK Reporter Assay Reveals Synergistic MAPK Pathway Activity Suppression by MAPK Inhibitor Combination in BRAF -Driven Pediatric Low-Grade Glioma Cells
Source: Oxford University Press journal article supplement (doi:10.1158/1535-7163.mct-19-1021), 2020-05-25
Supplement: 15357163mct191021-sup-231430_2_supp_6267053_q9l89q.xlsx [file 15357163mct191021-sup-231430_2_supp_6267053_q9l89q.xlsx]

## Sheet: Supp. Table S1
List of cloning primers
Purpose	Orientation	Sequence 5' - 3'
Extraction of reporter gene cassette and insertion of NotI binding site	Forward	CTTTATGCGGCCGCTTAGACGTTGATCCTGGCGC
Extraction of reporter gene cassette and insertion of XbaI binding site	Reverse	CGAACGTCTAGAAGGTACGGGAGGTATTGGAC
Extraction of blasticidin resistance gene and addition of overlapping sequences for subsequent ligation	Forward	GCGCCAGGATCAACGTCTAAGAACTTGGTTAGGTACCTTC
	Reverse	GAGGTTGATTGTTCCAGACG GATTGTACTGAGAGTGCACC
Linearization and amplification of pTRIPZ backbone including reporter gene cassette for subsequent ligation	Forward	CGTCTGGAACAATCAACC
	Reverse	CTTAGACGTTGATCCTGG
NotIBRAFfwd: Amplification of the cDNA for HA-tagged BRAFWT	Forward	AAGCGGCCGCGGTTATAAGATGGCGGCGCTGAGCGGTGGCGGTG
BRAF C-term-HA: Amplification of the cDNA for HA-tagged BRAFWT	Reverse	AGCGGCCGCATCAAGCGTAATCTGGAACATCGTATGGGTAAGCC
hBRAFV600Efwd: Introduction of the V600E mutation	Forward	GGTGATTTTGGTCTAGCTACAGAGAAATCTCGATGGAGTGGGTCC
hBRAFV600Erev: Introduction of the V600E mutation	Reverse	GGACCCACTCCATCGAGATTTCTCTGTAGCTAGACCAAAATCACC
MfeIKIAA1549fwdI: Amplification of the cDNA for long-form KIAA1549:BRAF	Forward	AAACAATTGGGAATGCCGGGGGCGCGGCGCCGAC
MfeIKIAA1549rev: Amplification of the cDNA for long-form KIAA1549:BRAF	Reverse	AAACAATTGGCGGGTTTAAACAGCGTAATCTGGAACATCGTATGGG
